# Supplementary material
Source: publisher site journal article supplement (https://www.spandidos-publications.com/1725/downloadSupplementary)
Supplement: Supplementary file 1 [file downloadSupplementary]

## Sheet: pairedInput
Table SII. Data for paired comparison.
ID	EMP1	Type
TCGA-BL-A13J-01	6.54566	Tumor
TCGA-BL-A13J-11	6.71536	Normal
TCGA-BT-A20N-01	6.55104	Tumor
TCGA-BT-A20N-11	6.67204	Normal
TCGA-BT-A20Q-01	6.38101	Tumor
TCGA-BT-A20Q-11	6.63931	Normal
TCGA-BT-A20R-01	6.72525	Tumor
TCGA-BT-A20R-11	6.9252	Normal
TCGA-BT-A20U-01	6.77369	Tumor
TCGA-BT-A20U-11	6.91481	Normal
TCGA-BT-A20W-01	6.33308	Tumor
TCGA-BT-A20W-11	6.58096	Normal
TCGA-BT-A2LA-01	6.08301	Tumor
TCGA-BT-A2LA-11	6.78204	Normal
TCGA-BT-A2LB-01	6.55493	Tumor
TCGA-BT-A2LB-11	7.06848	Normal
TCGA-CU-A0YN-01	6.73022	Tumor
TCGA-CU-A0YN-11	6.58675	Normal
TCGA-CU-A0YR-01	6.45209	Tumor
TCGA-CU-A0YR-11	6.67338	Normal
TCGA-GC-A3BM-01	6.44628	Tumor
TCGA-GC-A3BM-11	6.88989	Normal
TCGA-GC-A3WC-01	6.49299	Tumor
TCGA-GC-A3WC-11	6.60457	Normal
TCGA-GC-A6I3-01	6.14077	Tumor
TCGA-GC-A6I3-11	6.46959	Normal
TCGA-GD-A2C5-01	6.31162	Tumor
TCGA-GD-A2C5-11	6.61077	Normal
TCGA-GD-A3OP-01	6.51196	Tumor
TCGA-GD-A3OP-11	6.71141	Normal
TCGA-GD-A3OQ-01	6.72525	Tumor
TCGA-GD-A3OQ-11	6.46469	Normal
TCGA-K4-A3WV-01	6.35867	Tumor
TCGA-K4-A3WV-11	6.55615	Normal
TCGA-K4-A54R-01	6.46301	Tumor
TCGA-K4-A54R-11	6.96999	Normal
TCGA-K4-A5RI-01	6.54474	Tumor
TCGA-K4-A5RI-11	6.70382	Normal
